# Supplementary material for: Bioinspired Smart Dual-Responsive Actuator with Janus Structure and Complete Biodegradability
Source: Research Square preprint supplement (doi:10.21203/rs.3.rs-2103102/v1), 2022-09-30
Supplement: Supplementary file 1 [file 1a1a2bb8f297ae1f0e35e46e.docx]

Supporting Information

**Bioinspired Smart Dual-Responsive Actuator with Janus Structure and Complete Biodegradability**

Tiantian Yanga, b, #, *, Jingxuan Youb, c #, Chunchun Yinb, c, Jinming Zhangb, *, Yirong Wangb, c, Jun Zhangb, c

**Supporting information content**

Number of pages: 3

Number of figures: 3

Number of movies: 4


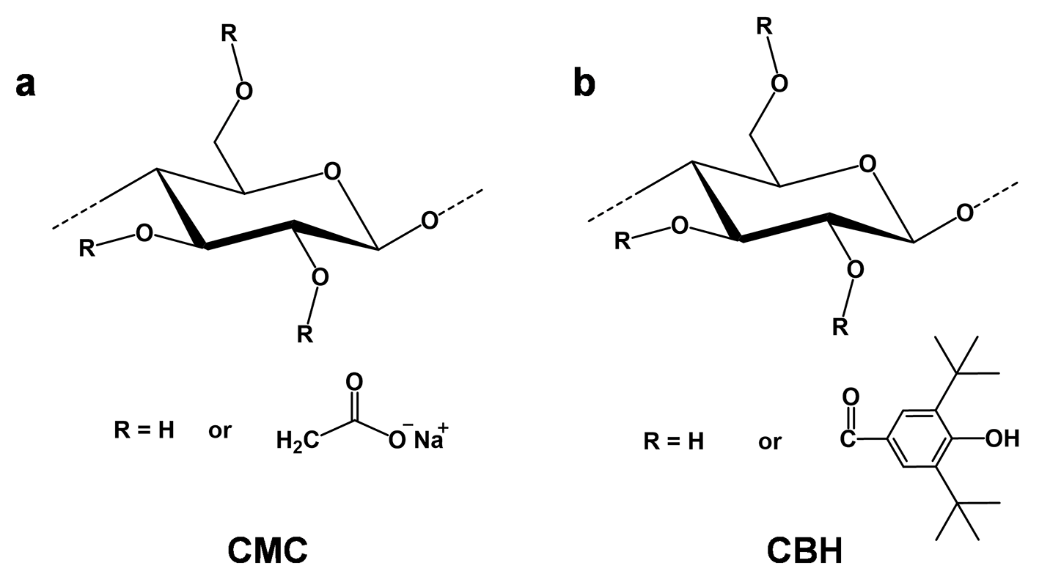


Figure S1. Chemical structure of CMC and CBH.


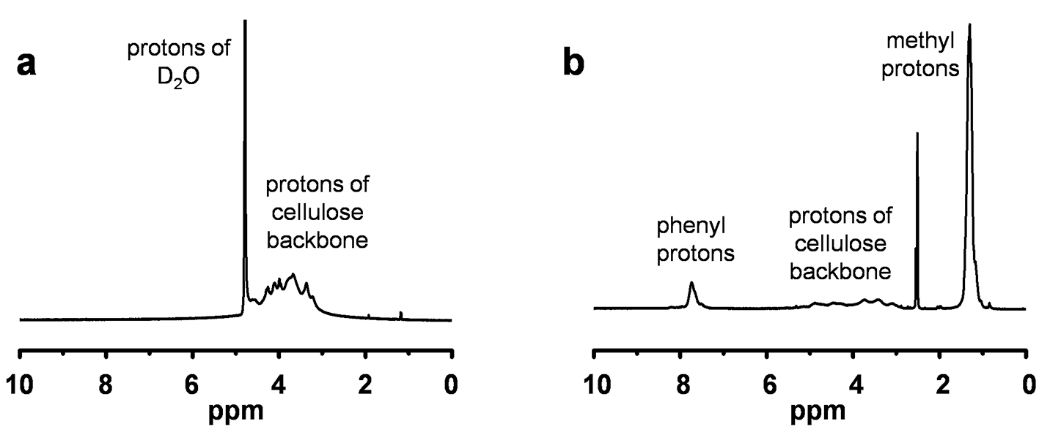


Figure S2. 1H-NMR spectra of (a) CMC (DS = 0.70) and (b) CBH (DS = 1.02).


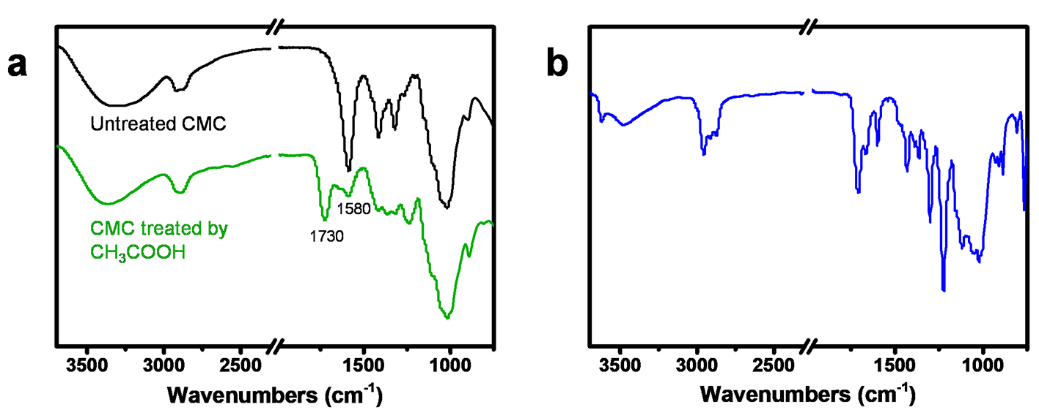


Figure S3. FTIR spectra of (a) CMC before and after CH3COOH treatment, and (b) CBH (DS = 1.02).

Caption of Movies

Movie S1 (separate file). Responsiveness of CBH/CMC Janus film to ethanol vapor.

Movie S2 (separate file). Moisture responsiveness of CMC film.

Movie S3 (separate file). Ethanol vapor responsiveness of CBH film.

Movie S4 (separate file). CBH/CMC Janus film as a dual-mode actuator which was assembled by a CBH/CMC Janus film coated with conductive Ag nanowires.
